# Supplementary material
Source: PubMed Central journal article supplement (PMC10330585)
Supplement: NIHMS1907778-supplement-Supplemental.pdf [file NIHMS1907778-supplement-Supplemental.pdf]

Supplemental Data

Supplemental Table 1 Pearson correlation coefficients for correlations between glyceemic biomarkers and adiposity measures in U.S. adults without diagnosed diabetes (n=9,750) and with diagnosed diabetes (n=1,085), NHANES 1999-2004.

|                                     | GA (%) |       | HbA1c (%) |       | GA:HbA1c |       |
|-------------------------------------|--------|-------|-----------|-------|----------|-------|
|                                     | Men    | Women | Men       | Women | Men      | Women |
| <b>Without Diabetes</b>             |        |       |           |       |          |       |
| BMI (kg/m <sup>2</sup> )            | -0.09  | -0.17 | 0.22      | 0.24  | -0.30    | -0.36 |
| Waist circumference (cm)            | -0.07  | -0.15 | 0.25      | 0.30  | -0.30    | -0.39 |
| Percent total body fat (%)          | -0.06  | -0.18 | 0.23      | 0.23  | -0.27    | -0.37 |
| Percent trunk fat (%)               | -0.06  | -0.19 | 0.25      | 0.27  | -0.28    | -0.42 |
| Fat mass index (kg/m <sup>2</sup> ) | -0.08  | -0.18 | 0.24      | 0.24  | -0.30    | -0.37 |
| <b>With Diabetes</b>                |        |       |           |       |          |       |
| BMI (kg/m <sup>2</sup> )            | -0.26  | -0.13 | -0.09     | 0.00  | -0.37    | -0.28 |
| Waist circumference (cm)            | -0.28  | -0.15 | -0.12     | 0.02  | -0.37    | -0.33 |
| Percent total body fat (%)          | -0.28  | -0.16 | -0.13     | -0.03 | -0.34    | -0.31 |
| Percent trunk fat (%)               | -0.30  | -0.16 | -0.12     | 0.03  | -0.39    | -0.39 |
| Fat mass index (kg/m <sup>2</sup> ) | -0.26  | -0.15 | -0.10     | -0.02 | -0.37    | -0.28 |

BMI, body mass index; GA, glycated albumin; HbA1c, hemoglobin A1c; NHANES, National Health and Nutrition Examination Survey

Supplemental Data

Supplemental Table 2 Linear regression coefficients for association between measures of adiposity (per weighted standard deviation) and glycated albumin (GA), HbA1c, and GA:HbA1c among U.S. adults without diagnosed diabetes (n=9,750) and with diagnosed diabetes (n=1,085), NHANES 1999-2004.<sup>a</sup>

|                                     | Model    | Men          |              |                       | Women        |              |                       |
|-------------------------------------|----------|--------------|--------------|-----------------------|--------------|--------------|-----------------------|
|                                     |          | GA (%)       | HbA1c (%)    | GA:HbA1c <sup>b</sup> | GA (%)       | HbA1c (%)    | GA:HbA1c <sup>b</sup> |
| <b>Without Diabetes</b>             |          |              |              |                       |              |              |                       |
| BMI (kg/m <sup>2</sup> )            | Crude    | -0.18 (0.04) | 0.13 (0.01)  | -0.09 (0.01)          | -0.31 (0.03) | 0.12 (0.01)  | -0.11 (0.01)          |
|                                     | Model 1  | -0.22 (0.04) | 0.13 (0.01)  | -0.10 (0.01)          | -0.38 (0.03) | 0.11 (0.01)  | -0.12 (0.01)          |
|                                     | Model 2a | -0.30 (0.04) | 0.12 (0.01)  | -0.11 (0.01)          | -0.47 (0.03) | 0.11 (0.01)  | -0.14 (0.01)          |
|                                     | Model 2b | -0.24 (0.04) | 0.11 (0.01)  | -0.09 (0.01)          | -0.36 (0.03) | 0.09 (0.01)  | -0.11 (0.01)          |
| Waist circumference (cm)            | Crude    | -0.14 (0.04) | 0.14 (0.01)  | -0.09 (0.01)          | -0.29 (0.03) | 0.15 (0.01)  | -0.13 (0.01)          |
|                                     | Model 1  | -0.26 (0.04) | 0.12 (0.01)  | -0.10 (0.01)          | -0.38 (0.03) | 0.13 (0.01)  | -0.13 (0.01)          |
|                                     | Model 2a | -0.35 (0.04) | 0.12 (0.01)  | -0.12 (0.01)          | -0.46 (0.03) | 0.13 (0.01)  | -0.15 (0.01)          |
|                                     | Model 2b | -0.29 (0.04) | 0.10 (0.01)  | -0.10 (0.01)          | -0.36 (0.03) | 0.11 (0.01)  | -0.12 (0.01)          |
| Percent total body fat (%)          | Crude    | -0.12 (0.03) | 0.12 (0.01)  | -0.08 (0.01)          | -0.32 (0.03) | 0.11 (0.01)  | -0.11 (0.01)          |
|                                     | Model 1  | -0.26 (0.04) | 0.10 (0.01)  | -0.09 (0.01)          | -0.45 (0.03) | 0.07 (0.01)  | -0.12 (0.01)          |
|                                     | Model 2a | -0.33 (0.04) | 0.10 (0.01)  | -0.10 (0.01)          | -0.54 (0.03) | 0.07 (0.01)  | -0.13 (0.01)          |
|                                     | Model 2b | -0.29 (0.04) | 0.07 (0.01)  | -0.09 (0.01)          | -0.46 (0.03) | 0.04 (0.01)  | -0.11 (0.01)          |
| Percent trunk fat (%)               | Crude    | -0.12 (0.03) | 0.14 (0.01)  | -0.08 (0.0)           | -0.34 (0.03) | 0.13 (0.01)  | -0.13 (0.01)          |
|                                     | Model 1  | -0.29 (0.04) | 0.11 (0.01)  | -0.10 (0.01)          | -0.48 (0.03) | 0.09 (0.01)  | -0.13 (0.01)          |
|                                     | Model 2a | -0.36 (0.04) | 0.11 (0.01)  | -0.11 (0.01)          | -0.56 (0.03) | 0.09 (0.01)  | -0.15 (0.01)          |
|                                     | Model 2b | -0.32 (0.04) | 0.09 (0.01)  | -0.10 (0.01)          | -0.50 (0.04) | 0.07 (0.01)  | -0.13 (0.01)          |
| Fat mass index (kg/m <sup>2</sup> ) | Crude    | -0.15 (0.03) | 0.12 (0.01)  | -0.08 (0.01)          | -0.31 (0.03) | 0.11 (0.01)  | -0.11 (0.0)           |
|                                     | Model 1  | -0.22 (0.03) | 0.11 (0.01)  | -0.09 (0.01)          | -0.39 (0.03) | 0.09 (0.01)  | -0.11 (0.0)           |
|                                     | Model 2a | -0.30 (0.04) | 0.11 (0.01)  | -0.10 (0.01)          | -0.48 (0.03) | 0.09 (0.01)  | -0.13 (0.01)          |
|                                     | Model 2b | -0.25 (0.04) | 0.09 (0.01)  | -0.09 (0.01)          | -0.39 (0.03) | 0.06 (0.01)  | -0.10 (0.01)          |
| <b>With Diabetes</b>                |          |              |              |                       |              |              |                       |
| BMI (kg/m <sup>2</sup> )            | Crude    | -1.65 (0.35) | -0.17 (0.09) | -0.16 (0.02)          | -0.87 (0.33) | 0.01 (0.12)  | -0.12 (0.03)          |
|                                     | Model 1  | -1.68 (0.32) | -0.17 (0.09) | -0.16 (0.02)          | -1.05 (0.37) | -0.03 (0.12) | -0.13 (0.04)          |
|                                     | Model 2a | -1.87 (0.34) | -0.20 (0.09) | -0.17 (0.02)          | -1.49 (0.45) | -0.10 (0.13) | -0.16 (0.04)          |
|                                     | Model 2b | -1.81 (0.32) | -0.22 (0.08) | -0.16 (0.02)          | -1.24 (0.40) | -0.17 (0.14) | -0.10 (0.04)          |
| Waist circumference (cm)            | Crude    | -1.78 (0.38) | -0.22 (0.11) | -0.16 (0.02)          | -0.98 (0.37) | 0.04 (0.11)  | -0.14 (0.03)          |
|                                     | Model 1  | -1.73 (0.35) | -0.18 (0.10) | -0.16 (0.02)          | -0.92 (0.37) | 0.09 (0.10)  | -0.14 (0.03)          |
|                                     | Model 2a | -1.89 (0.36) | -0.21 (0.10) | -0.17 (0.02)          | -1.28 (0.44) | 0.04 (0.10)  | -0.17 (0.03)          |
|                                     | Model 2b | -1.91 (0.34) | -0.24 (0.10) | -0.16 (0.02)          | -1.09 (0.42) | -0.03 (0.11) | -0.12 (0.04)          |
| Percent total body fat (%)          | Crude    | -1.66 (0.50) | -0.22 (0.13) | -0.13 (0.03)          | -1.08 (0.31) | -0.07 (0.11) | -0.13 (0.03)          |

Supplemental Data

|                                     |          |                     |              |                     |                     |              |                     |
|-------------------------------------|----------|---------------------|--------------|---------------------|---------------------|--------------|---------------------|
|                                     | Model 1  | <b>-1.38 (0.46)</b> | -0.10 (0.13) | <b>-0.14 (0.02)</b> | <b>-0.96 (0.28)</b> | -0.02 (0.10) | <b>-0.13 (0.03)</b> |
|                                     | Model 2a | <b>-1.49 (0.48)</b> | -0.12 (0.13) | <b>-0.15 (0.02)</b> | <b>-1.34 (0.34)</b> | -0.08 (0.10) | <b>-0.16 (0.03)</b> |
|                                     | Model 2b | <b>-1.47 (0.44)</b> | -0.14 (0.12) | <b>-0.14 (0.02)</b> | <b>-1.11 (0.28)</b> | -0.15 (0.10) | <b>-0.11 (0.03)</b> |
| Percent trunk fat (%)               | Crude    | <b>-1.85 (0.52)</b> | -0.22 (0.14) | <b>-0.16 (0.04)</b> | <b>-1.04 (0.33)</b> | 0.05 (0.09)  | <b>-0.16 (0.03)</b> |
|                                     | Model 1  | <b>-1.58 (0.48)</b> | -0.10 (0.13) | <b>-0.16 (0.02)</b> | <b>-1.02 (0.33)</b> | 0.06 (0.08)  | <b>-0.16 (0.03)</b> |
|                                     | Model 2a | <b>-1.66 (0.49)</b> | -0.12 (0.13) | <b>-0.17 (0.02)</b> | <b>-1.33 (0.37)</b> | 0.02 (0.09)  | <b>-0.19 (0.03)</b> |
|                                     | Model 2b | <b>-1.70 (0.47)</b> | -0.15 (0.12) | <b>-0.16 (0.03)</b> | <b>-1.22 (0.36)</b> | -0.06 (0.09) | <b>-0.15 (0.03)</b> |
| Fat mass index (kg/m <sup>2</sup> ) | Crude    | <b>-1.53 (0.41)</b> | -0.16 (0.11) | <b>-0.14 (0.02)</b> | <b>-1.01 (0.30)</b> | -0.04 (0.11) | <b>-0.12 (0.03)</b> |
|                                     | Model 1  | <b>-1.40 (0.37)</b> | -0.11 (0.10) | <b>-0.14 (0.02)</b> | <b>-1.13 (0.31)</b> | -0.07 (0.10) | <b>-0.13 (0.03)</b> |
|                                     | Model 2a | <b>-1.54 (0.40)</b> | -0.13 (0.10) | <b>-0.15 (0.02)</b> | <b>-1.55 (0.38)</b> | -0.14 (0.11) | <b>-0.16 (0.03)</b> |
|                                     | Model 2b | <b>-1.49 (0.36)</b> | -0.15 (0.09) | <b>-0.14 (0.02)</b> | <b>-1.37 (0.34)</b> | -0.22 (0.12) | <b>-0.11 (0.03)</b> |

<sup>a</sup>Values are beta coefficient (SE) per 1 SD of the sex-stratified adiposity measurement. Boldface indicates P<0.05. Model 1 adjusts for age, race/ethnicity, smoking status, and eGFR. Model 2 adjusted for Model 1 covariates and additionally controlled for (a) serum albumin (g/dL) or (b) natural log-transformed C-reactive protein (mg/dL). Men without diabetes: 1 SD = 5.2 kg/m<sup>2</sup> BMI, 14.1 cm waist circumference, 5.7% body fat, 7.0% trunk fat, 2.5 kg/m<sup>2</sup> fat mass index. Women without diabetes: 1 SD = 6.6 kg/m<sup>2</sup> BMI, 14.9 cm waist circumference, 6.2% body fat, 7.9% trunk fat, 3.7 kg/m<sup>2</sup> fat mass index. Men with diabetes: 1 SD = 6.6 kg/m<sup>2</sup> BMI, 16.3 cm waist circumference, 4.9% body fat, 6.0% trunk fat, 2.5 kg/m<sup>2</sup> fat mass index. Women with diabetes: 1 SD = 7.6 kg/m<sup>2</sup> BMI, 16.0 cm waist circumference, 5.6% body fat, 6.8% trunk fat, 3.6 kg/m<sup>2</sup> fat mass index. BMI, body mass index; GA, glycated albumin; HbA1c, hemoglobin A1c; SD, standard deviation; SE, standard error

<sup>b</sup>Beta coefficients for GA:HbA1c, the ratio of GA to HbA1c, represent the divergence of GA from HbA1c associated with each 1 SD increase in adiposity. A negative coefficient indicates that the change in albumin glycation is less than the change in hemoglobin glycation (i.e. GA increases less than HbA1c) as adiposity increases.

Supplemental Data

Supplemental Table 3 Linear regression coefficients for associations between measures of adiposity (per weighted standard deviation) and glycated albumin, HbA1c, and GA:HbA1c in sensitivity analysis excluding conditions that affect albumin or red blood cell turnover among U.S. adults without diagnosed diabetes (n=7,984) and with diagnosed diabetes (n=679), NHANES 1999-2004.<sup>a</sup>

|                                     | Model                 | Men          |              |                       | Women        |              |                       |
|-------------------------------------|-----------------------|--------------|--------------|-----------------------|--------------|--------------|-----------------------|
|                                     |                       | GA (%)       | HbA1c (%)    | GA:HbA1c <sup>b</sup> | GA (%)       | HbA1c (%)    | GA:HbA1c <sup>b</sup> |
| <b>Without Diabetes</b>             |                       |              |              |                       |              |              |                       |
| BMI (kg/m <sup>2</sup> )            | Unadjusted            | -0.21 (0.03) | 0.11 (0.01)  | -0.09 (0.01)          | -0.34 (0.03) | 0.12 (0.01)  | -0.12 (0.01)          |
|                                     | 1                     | -0.25 (0.03) | 0.11 (0.01)  | -0.09 (0.01)          | -0.39 (0.03) | 0.10 (0.01)  | -0.12 (0.01)          |
|                                     | 2a                    | -0.33 (0.03) | 0.10 (0.01)  | -0.11 (0.01)          | -0.49 (0.03) | 0.10 (0.01)  | -0.14 (0.01)          |
|                                     | 2b                    | -0.27 (0.03) | 0.09 (0.01)  | -0.09 (0.01)          | -0.38 (0.03) | 0.08 (0.01)  | -0.11 (0.01)          |
|                                     | Waist circumference   | Unadjusted   | -0.17 (0.03) | 0.13 (0.01)           | -0.09 (0.01) | -0.32 (0.03) | 0.15 (0.01)           |
|                                     | 1                     | -0.29 (0.03) | 0.11 (0.01)  | -0.10 (0.01)          | -0.40 (0.03) | 0.12 (0.01)  | -0.13 (0.01)          |
|                                     | 2a                    | -0.37 (0.03) | 0.10 (0.01)  | -0.11 (0.01)          | -0.49 (0.03) | 0.12 (0.01)  | -0.15 (0.01)          |
|                                     | 2b                    | -0.32 (0.04) | 0.09 (0.01)  | -0.10 (0.01)          | -0.39 (0.04) | 0.10 (0.01)  | -0.12 (0.01)          |
| Percent total body fat (%)          | Unadjusted            | -0.13 (0.03) | 0.12 (0.01)  | -0.08 (0.01)          | -0.34 (0.03) | 0.11 (0.01)  | -0.12 (0.01)          |
|                                     | 1                     | -0.26 (0.04) | 0.09 (0.01)  | -0.09 (0.01)          | -0.46 (0.03) | 0.07 (0.01)  | -0.12 (0.01)          |
|                                     | 2a                    | -0.33 (0.04) | 0.09 (0.01)  | -0.10 (0.01)          | -0.56 (0.03) | 0.07 (0.01)  | -0.14 (0.01)          |
|                                     | 2b                    | -0.29 (0.04) | 0.07 (0.01)  | -0.08 (0.01)          | -0.47 (0.04) | 0.04 (0.01)  | -0.11 (0.01)          |
|                                     | Percent trunk fat (%) | Unadjusted   | -0.12 (0.04) | 0.13 (0.01)           | -0.08 (0.01) | -0.37 (0.03) | 0.13 (0.01)           |
| 1                                   |                       | -0.29 (0.04) | 0.10 (0.01)  | -0.10 (0.01)          | -0.49 (0.03) | 0.09 (0.01)  | -0.14 (0.01)          |
| 2a                                  |                       | -0.35 (0.04) | 0.10 (0.01)  | -0.11 (0.01)          | -0.58 (0.03) | 0.09 (0.01)  | -0.15 (0.01)          |
| 2b                                  |                       | -0.32 (0.04) | 0.08 (0.01)  | -0.09 (0.01)          | -0.52 (0.04) | 0.06 (0.01)  | -0.13 (0.01)          |
| Fat mass index (kg/m <sup>2</sup> ) |                       | Unadjusted   | -0.17 (0.03) | 0.11 (0.01)           | -0.08 (0.01) | -0.34 (0.03) | 0.11 (0.01)           |
|                                     | 1                     | -0.24 (0.03) | 0.10 (0.01)  | -0.09 (0.01)          | -0.41 (0.03) | 0.09 (0.01)  | -0.12 (0.01)          |
|                                     | 2a                    | -0.32 (0.03) | 0.09 (0.01)  | -0.10 (0.01)          | -0.50 (0.02) | 0.08 (0.01)  | -0.13 (0.01)          |
|                                     | 2b                    | -0.27 (0.03) | 0.08 (0.01)  | -0.08 (0.01)          | -0.41 (0.03) | 0.06 (0.01)  | -0.11 (0.01)          |
|                                     | <b>With Diabetes</b>  |              |              |                       |              |              |                       |
| BMI (kg/m <sup>2</sup> )            | Unadjusted            | -1.77 (0.34) | -0.29 (0.11) | -0.14 (0.02)          | -0.84 (0.39) | 0.02 (0.13)  | -0.12 (0.04)          |
|                                     | 1                     | -1.80 (0.33) | -0.28 (0.11) | -0.15 (0.02)          | -1.23 (0.45) | -0.07 (0.12) | -0.14 (0.04)          |
|                                     | 2a                    | -2.01 (0.35) | -0.30 (0.11) | -0.17 (0.02)          | -1.71 (0.52) | -0.17 (0.15) | -0.17 (0.04)          |
|                                     | 2b                    | -2.09 (0.33) | -0.37 (0.11) | -0.15 (0.03)          | -1.50 (0.51) | -0.21 (0.14) | -0.12 (0.04)          |
|                                     | Waist circumference   | Unadjusted   | -1.93 (0.37) | -0.34 (0.13)          | -0.14 (0.02) | -0.98 (0.45) | 0.07 (0.12)           |
| 1                                   |                       | -1.84 (0.36) | -0.28 (0.12) | -0.15 (0.03)          | -1.08 (0.46) | 0.06 (0.10)  | -0.16 (0.04)          |
| 2a                                  |                       | -2.04 (0.40) | -0.30 (0.13) | -0.17 (0.03)          | -1.50 (0.51) | -0.01 (0.12) | -0.19 (0.04)          |
| 2b                                  |                       | -2.21 (0.37) | -0.39 (0.12) | -0.16 (0.03)          | -1.35 (0.56) | -0.04 (0.12) | -0.15 (0.04)          |

Supplemental Data

|                                     |                       |                     |                     |                     |                     |                     |                     |
|-------------------------------------|-----------------------|---------------------|---------------------|---------------------|---------------------|---------------------|---------------------|
| Percent total body fat (%)          | Unadjusted            | <b>-1.71 (0.49)</b> | -0.26 (0.16)        | <b>-0.13 (0.02)</b> | <b>-1.05 (0.36)</b> | -0.06 (0.11)        | <b>-0.13 (0.03)</b> |
|                                     | 1                     | <b>-1.49 (0.46)</b> | -0.15 (0.15)        | <b>-0.14 (0.02)</b> | <b>-1.05 (0.35)</b> | -0.06 (0.10)        | <b>-0.13 (0.03)</b> |
|                                     | 2a                    | <b>-1.58 (0.50)</b> | -0.16 (0.16)        | <b>-0.15 (0.02)</b> | <b>-1.48 (0.40)</b> | -0.14 (0.11)        | <b>-0.16 (0.03)</b> |
|                                     | 2b                    | <b>-1.69 (0.43)</b> | -0.21 (0.14)        | <b>-0.15 (0.02)</b> | <b>-1.22 (0.33)</b> | -0.17 (0.09)        | <b>-0.11 (0.03)</b> |
|                                     | Percent trunk fat (%) | Unadjusted          | <b>-1.82 (0.52)</b> | -0.25 (0.17)        | <b>-0.15 (0.02)</b> | <b>-0.99 (0.42)</b> | 0.10 (0.11)         |
|                                     | 1                     | <b>-1.63 (0.49)</b> | -0.15 (0.16)        | <b>-0.16 (0.02)</b> | <b>-1.12 (0.43)</b> | 0.05 (0.10)         | <b>-0.17 (0.03)</b> |
|                                     | 2a                    | <b>-1.70 (0.52)</b> | -0.15 (0.17)        | <b>-0.17 (0.02)</b> | <b>-1.45 (0.46)</b> | -0.01 (0.11)        | <b>-0.19 (0.03)</b> |
|                                     | 2b                    | <b>-1.90 (0.45)</b> | -0.22 (0.15)        | <b>-0.17 (0.02)</b> | <b>-1.36 (0.47)</b> | -0.04 (0.11)        | <b>-0.16 (0.03)</b> |
| Fat mass index (kg/m <sup>2</sup> ) | Unadjusted            | <b>-1.57 (0.39)</b> | -0.23 (0.13)        | <b>-0.13 (0.02)</b> | <b>-0.99 (0.35)</b> | -0.03 (0.11)        | <b>-0.13 (0.03)</b> |
|                                     | 1                     | <b>-1.47 (0.36)</b> | -0.17 (0.12)        | <b>-0.14 (0.02)</b> | <b>-1.29 (0.38)</b> | -0.10 (0.10)        | <b>-0.14 (0.03)</b> |
|                                     | 2a                    | <b>-1.60 (0.40)</b> | -0.18 (0.13)        | <b>-0.15 (0.02)</b> | <b>-1.80 (0.44)</b> | -0.21 (0.12)        | <b>-0.17 (0.04)</b> |
|                                     | 2b                    | <b>-1.68 (0.33)</b> | <b>-0.23 (0.11)</b> | <b>-0.14 (0.02)</b> | <b>-1.63 (0.42)</b> | <b>-0.25 (0.11)</b> | <b>-0.13 (0.03)</b> |

<sup>a</sup>Values are beta coefficient (SE) per 1 SD of the sex-stratified adiposity measurement. Boldface indicates P<0.05. Model 1 adjusts for age, race/ethnicity, smoking status, and eGFR. Model 2 adjusted for Model 1 covariates and additionally controlled for (a) serum albumin (g/dL) or (b) natural log-transformed C-reactive protein (mg/dL). Men without diabetes: 1 SD = 5.1 kg/m<sup>2</sup> BMI, 14.0 cm waist circumference, 6.0% body fat, 7.2% trunk fat, 3.1 kg/m<sup>2</sup> fat mass index. Women without diabetes: 1 SD = 6.5 kg/m<sup>2</sup> BMI, 14.9 cm waist circumference, 6.4% body fat, 8.2% trunk fat, 4.4 kg/m<sup>2</sup> fat mass index. Men with diabetes: 1 SD = 6.3 kg/m<sup>2</sup> BMI, 15.6 cm waist circumference, 5.5% body fat, 6.1% trunk fat, 3.7 kg/m<sup>2</sup> fat mass index. Women with diabetes: 1 SD = 7.7 kg/m<sup>2</sup> BMI, 16.3 cm waist circumference, 5.5% body fat, 6.8% trunk fat, 5.0 kg/m<sup>2</sup> fat mass index.

<sup>b</sup>Beta coefficients for GA:HbA1c, the ratio of GA to HbA1c, represent the divergence of GA from HbA1c associated with each 1 SD increase in adiposity. A negative coefficient indicates that the change in albumin glycation is less than the change in hemoglobin glycation (i.e. GA increases less than HbA1c) as adiposity increases. BMI, body mass index; GA, glycated albumin; HbA1c, hemoglobin A1c; NHANES, National Health and Nutrition Examination Survey; SD, standard deviation; SE, standard error

Supplemental Data

Supplemental Table 4 Sensitivity and specificity of glycated albumin to detect elevated HbA1c in sensitivity analysis excluding conditions that affect albumin or red blood cell turnover among U.S. adults without diagnosed diabetes (n=7,984) and with diagnosed diabetes (n=679), NHANES 1999-2004.

|                  | GA    | HbA1c | Subgroup                  | Sensitivity (95% CI) | Specificity (95% CI) |
|------------------|-------|-------|---------------------------|----------------------|----------------------|
| Without Diabetes | 14.2% | ≥5.7% | BMI <30 kg/m <sup>2</sup> | 0.37 (0.32-0.43)     | 0.81 (0.78-0.85)     |
|                  |       | ≥5.7% | BMI ≥30 kg/m <sup>2</sup> | 0.28 (0.24-0.33)     | 0.92 (0.89-0.94)     |
|                  | 17.3% | ≥6.5% | BMI <30 kg/m <sup>2</sup> | 0.55 (0.36-0.72)     | 0.99 (0.98-1.00)     |
|                  |       | ≥6.5% | BMI ≥30 kg/m <sup>2</sup> | 0.46 (0.35-0.58)     | 0.99 (0.99-1.00)     |
| With Diabetes    | 17.5% | ≥7.0% | BMI <30 kg/m <sup>2</sup> | 0.93 (0.86-0.96)     | 0.83 (0.74-0.90)     |
|                  |       | ≥7.0% | BMI ≥30 kg/m <sup>2</sup> | 0.81 (0.69-0.89)     | 0.89 (0.83-0.94)     |

Abbreviations: BMI, body mass index; CI, confidence interval; GA, glycated albumin; HbA1c, hemoglobin A1c

Supplemental Data

Supplemental Figure 1 Flowchart of exclusion criteria

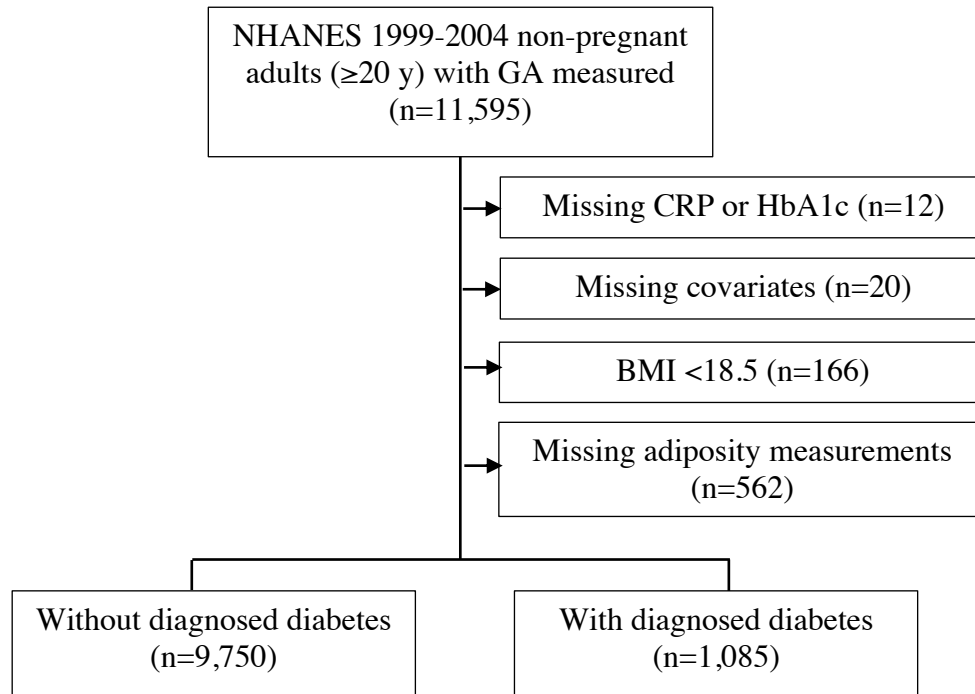

Supplemental Data

Supplemental Figure 2 Weighted scatterplots (with loess curves) for HbA1c and glycated albumin in US adults, NHANES 1999-2004.

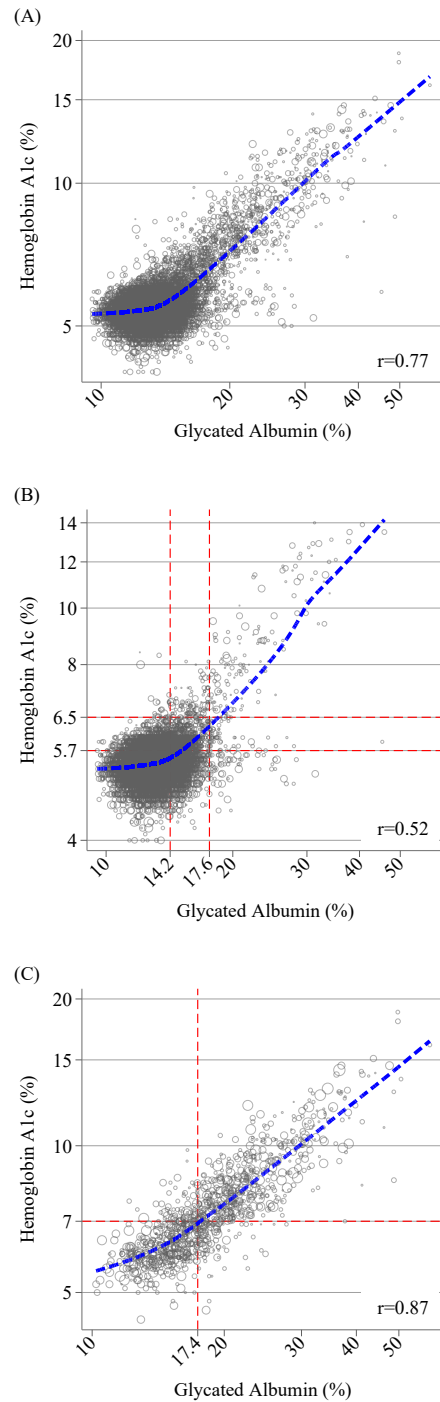

Scatterplots and Pearson correlation coefficients are presented for overall study population (A) and separately in people without diabetes (B) and with diabetes (C). Glycated albumin values of 14.2% and 17.6% represent percentile equivalents of HbA1c 5.7% and 6.5% in people without diabetes. Glycated albumin 17.4% represents percentile equivalent of HbA1c 7.0% in people with diabetes. Figures are presented on the log scale.



## Supplemental Data

Supplemental Figure 3 Associations of body mass index with GA, HbA1c, and GA:HbA1c in adults without diagnosed diabetes (n=9,750), NHANES 1999-2004.

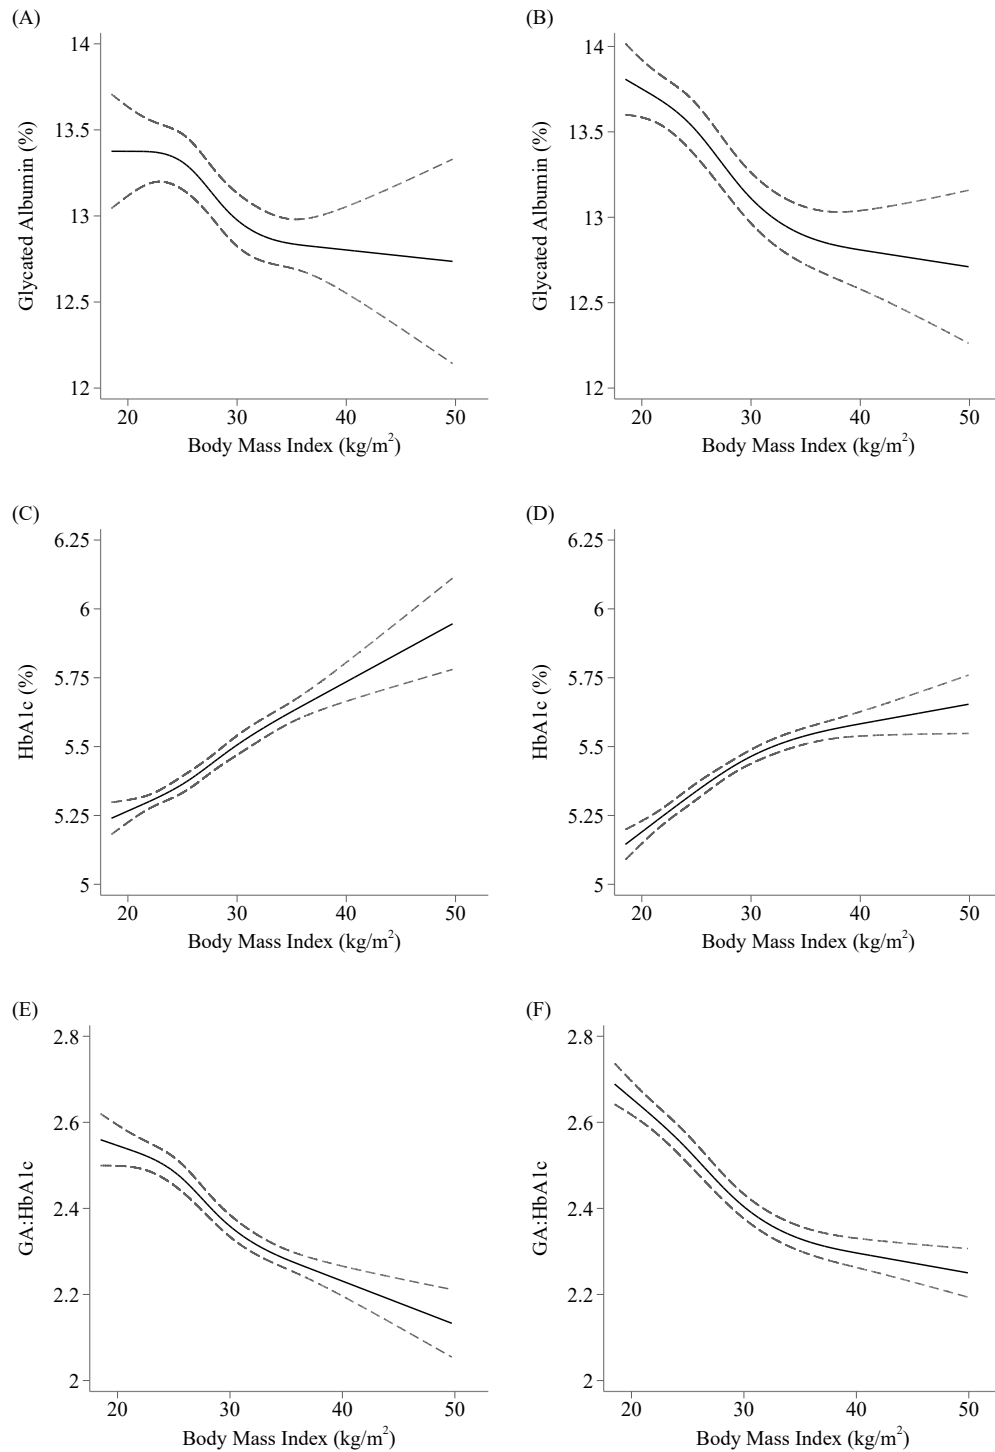

GA vs. body mass index in (A) men and (B) women. HbA1c vs. body mass index in (C) men and (D) women. GA:HbA1c vs. body mass index in (E) men and (F) women. Solid lines represent the predicted values from unadjusted regression models using restricted cubic splines with four

## Supplemental Data

knots at the 5<sup>th</sup>, 35<sup>th</sup>, 65<sup>th</sup>, and 95<sup>th</sup> percentiles; dashed lines represent the corresponding 95% confidence intervals. Figure truncated at BMI 50 kg/m<sup>2</sup>. GA, glycated albumin; HbA1c, hemoglobin A1c; NHANES, National Health and Nutrition Examination Survey

## Supplemental Data

Supplemental Figure 4 Associations of body mass index with GA, HbA1c, and GA:HbA1c in adults with diagnosed diabetes (n=1,085), NHANES 1999-2004.

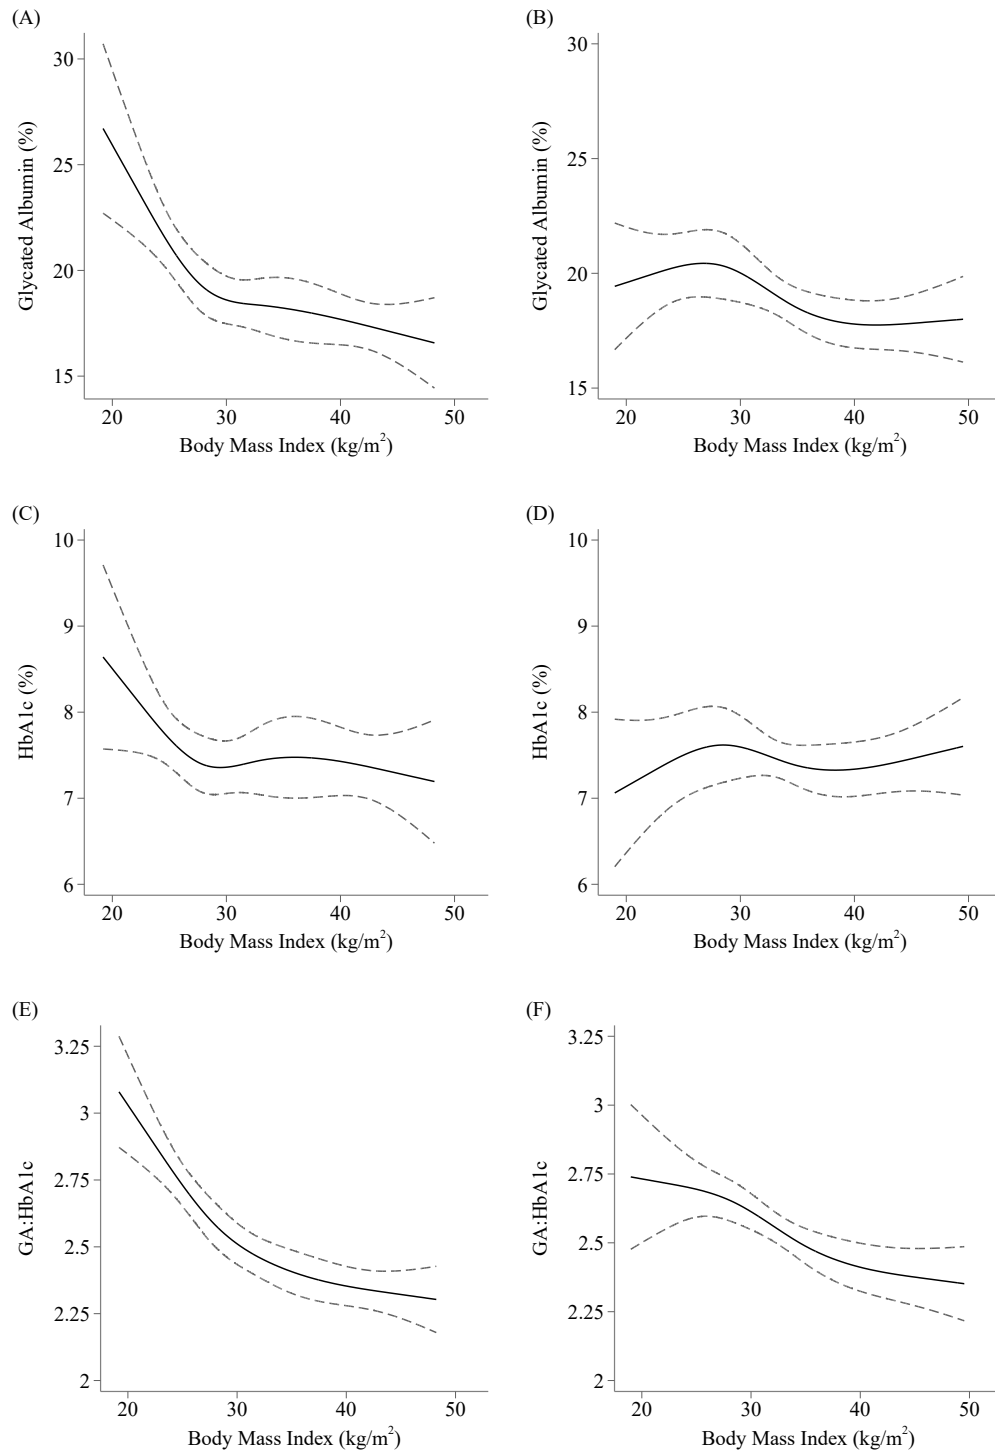

GA vs. body mass index in (A) men and (B) women. HbA1c vs. body mass index in (C) men and (D) women. GA:HbA1c vs. body mass index in (E) men and (F) women. Solid lines represent the predicted values from unadjusted regression models using restricted cubic splines with four

## Supplemental Data

knots at the 5th, 35th, 65th, and 95th percentiles; dashed lines represent the corresponding 95% confidence intervals. Figure truncated at BMI 50 kg/m<sup>2</sup>. GA, glycated albumin; HbA1c, hemoglobin A1c; NHANES, National Health and Nutrition Examination Survey
